# Supplementary material for: Analysis of Deep Learning Techniques for Dental Informatics: A Systematic Literature Review
Source: MDPI journal article supplement (doi:10.3390/healthcare10101892), 2022-09-28
Supplement: s1 [file s1]

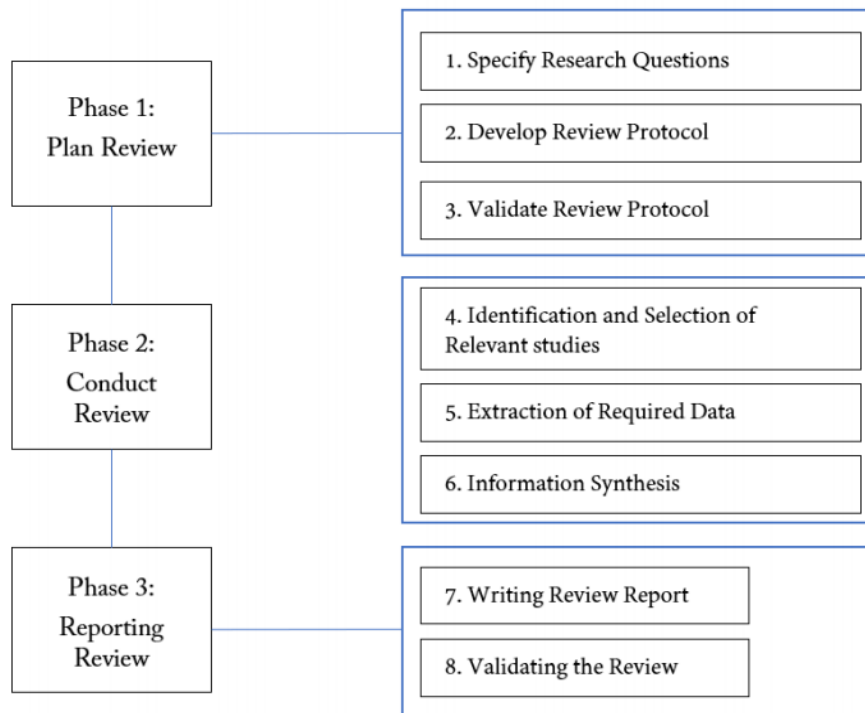

**Figure S1. Phase Involved in SLR process**

**Table S1. (a) Inclusion criteria description of research studies**

| Inclusion Criteria                                                                                     |
|--------------------------------------------------------------------------------------------------------|
| The research was relevant to data informatics sources.                                                 |
| The research was directly related to the images and data used in dental practices.                     |
| The research was conducted using DL techniques for DI applications.                                    |
| The research used performance measurement techniques.                                                  |
| The research was conducted for the analysis of deep learning techniques performance in dental objects. |
| For duplicate publications of the same study, the newest and most complete one was selected.           |
| This is recorded for only one study whose related work appeared two times.                             |

**Table S1. (b) exclusion criteria description of research studies.**

| Exclusion Criteria                                                                                                |
|-------------------------------------------------------------------------------------------------------------------|
| Studies that were irrelevant to dental illness and the dental healthcare domain were skipped.                     |
| Studies with the word “informatics” were used in many domains which are excluded due to limitations of our scope. |

**Table S2. Quality checklist.**

| No. | Questions                                                                                           |
|-----|-----------------------------------------------------------------------------------------------------|
| 1   | Was there a strong focus on dental informatics, such as CAD/CAM, in the studies?                    |
| 2   | Was the study able to describe how deep learning is applied in the field of dental informatics?     |
| 3   | Is there a model to evaluate deep learning approaches in dental informatics that has been proposed? |
| 4   | Is the study concentrating on the basic deep learning approaches for huge dental practice data?     |
| 5   | Is there any mention of model performance adopting core approaches in the study?                    |

**Table S3. Data extraction.**

| Study                                   |
|-----------------------------------------|
| Study Research Problem Contributions    |
| RQ1: Deep learning                      |
| RQ2: Dental informatics                 |
| RQ3: Images and Datasets                |
| RQ4: Performance Measurement Techniques |

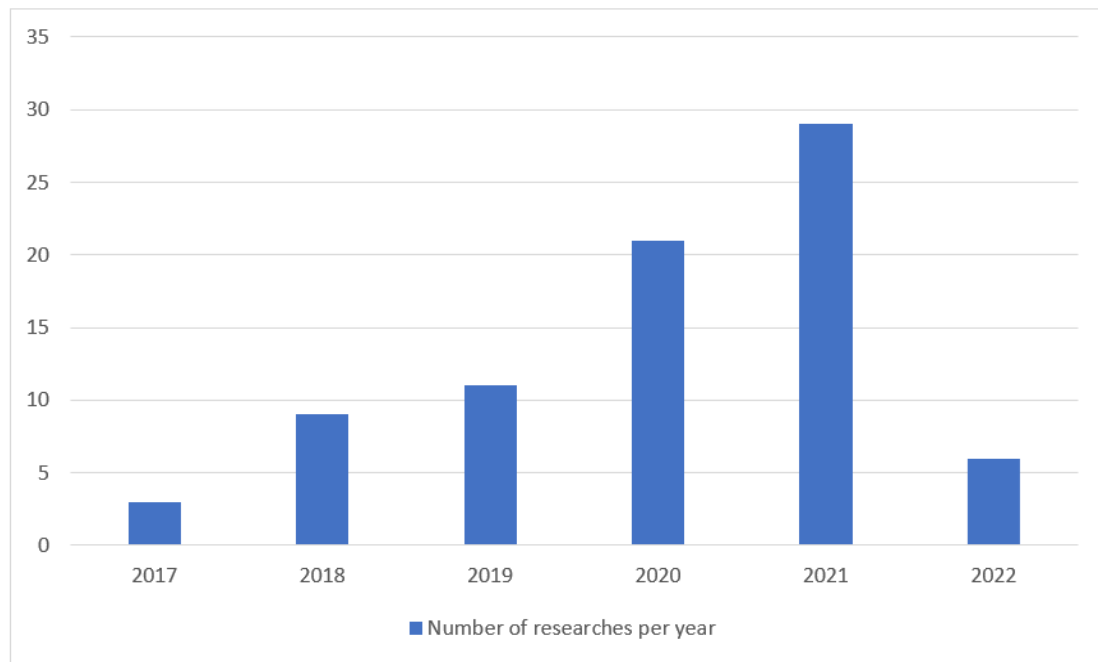

**Figure S2. This figure shows the published number of deep-learning-based dental informatics studies in the past 5 years and the current year.**
